# Supplementary material for: C3N nanodots inhibits Aβ peptides aggregation pathogenic path in Alzheimer’s disease
Source: Springer Nature journal article supplement (doi:10.1038/s41467-023-41489-y), 2023-09-15
Supplement: MOESM1 [file 41467_2023_41489_MOESM1_ESM.pdf]

## Supporting Information for

# C<sub>3</sub>N Nanodots Inhibits A $\beta$ Peptides Aggregation Pathogenic Path in Alzheimer's Disease

Xiuhua Yin<sup>1,2#</sup>, Hong Zhou<sup>1#</sup>, Mengling Zhang<sup>2,3#</sup>, Juan Su<sup>4</sup>, Xiao Wang<sup>2</sup>, Sijie Li<sup>4</sup>  
, Zaixing Yang<sup>1,4\*</sup>, Zhenhui Kang<sup>2,3\*</sup>, Ruhong Zhou<sup>1,5\*</sup>

1. Institute of Quantitative Biology, Shanghai Institute for Advanced Study, College of Life Sciences, Zhejiang University, Hangzhou 310027, China
2. Jiangsu Key Laboratory for Carbon-based Functional Materials and Devices, Institute of Functional Nano and Soft Materials (FUNSOM), Soochow University, Suzhou 215123, China
3. Macao Institute of Materials Science and Engineering (MIMSE), MUST–SUDA Joint Research Center for Advanced Functional Materials, Macau University of Science and Technology, Taipa 999078, Macao, China.
4. Key Laboratory of Radiation Medicine and Protection, School for Radiological and Interdisciplinary Sciences (RAD-X), Soochow University, Suzhou 215123, China
5. Department of Chemistry, Columbia University, New York, New York 10027, United States;

#These authors contribute equally.

\*Corresponding authors: rhzhou@zju.edu.cn (R. Zhou); zhkang@suda.edu.cn (Z. Kang); zxyang@suda.edu.cn (Z. Yang)

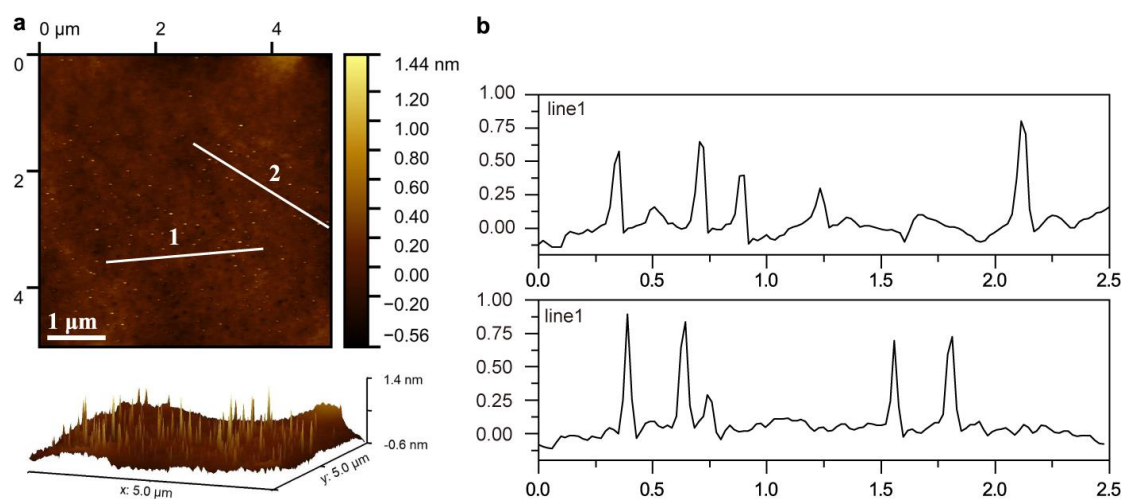

Supplementary Figure 1. Morphological characterization of C<sub>3</sub>N nanodots. (a) Atomic force microscope (AFM) images of C<sub>3</sub>N nanodots. (b) The height-profile plots corresponding to the white lines in AFM image. Scale bar = 1 μm. Source data are provided as a Source Data file.

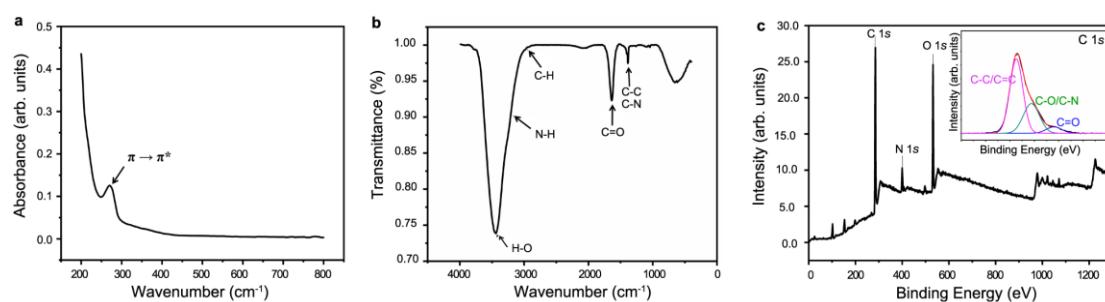

Supplementary Figure 2. Spectrum characterization of C<sub>3</sub>N nanodots. (a) Ultraviolet–visible spectrum, (b) Fourier transform infrared spectrum, and (c) X-ray photoelectron spectroscopy of C<sub>3</sub>N nanodots. arb. units = arb arbitrary units. Source data are provided as a Source Data file.

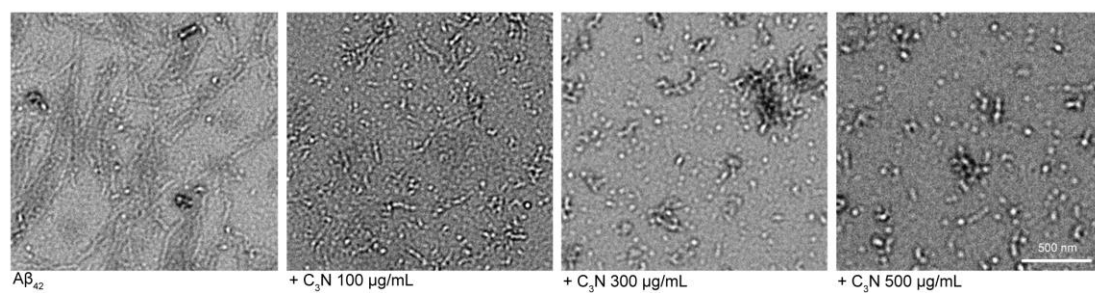

Supplementary Figure 3. Transmission electron microscope (TEM) images of  $A\beta_{42}$  peptides treated with/without  $C_3N$  nanodots at different concentrations for 24 hours. Representative micrographs from three independent experiments with similar results.

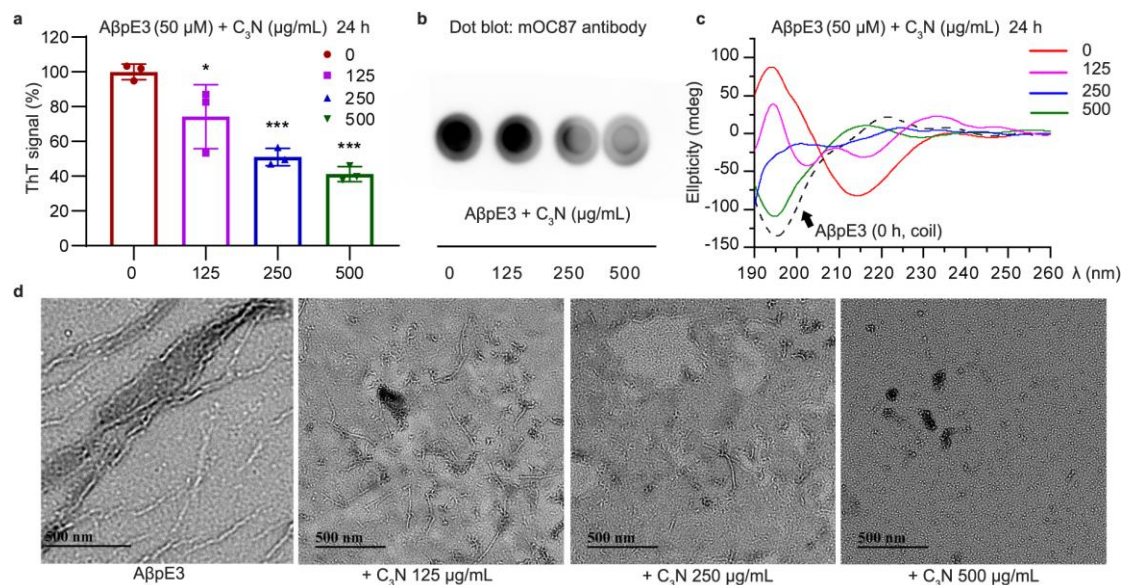

Supplementary Figure 4. C<sub>3</sub>N nanodots inhibit N-truncated Aβ peptides (AβpE3) fibrillization in vitro. (a) Thioflavin T (ThT) fluorescence analysis of the effect of C<sub>3</sub>N nanodots on the aggregation of AβpE3 peptides (50 μM) after 24-hour treatment with different concentrations of C<sub>3</sub>N nanodots. Data are presented as mean ± SD and signals were normalized by setting the ThT signals of control group to 100% ( $n = 3$ ). Statistical significance was determined by one-way ANOVA with  $P < 0.05$  considered statistically significant ( $P = 0.0338, 0.0009$  and  $0.0003$ , respectively). \* $P < 0.05$ , \*\*\* $P < 0.001$ . (b) Dot blot assay measuring the levels of amyloid fiber formation under different conditions using an Aβ fibrils conformation-specific antibody (mOC87 antibody) at time = 24 hours. (c) Circular dichroism (CD) spectra of AβpE3 peptides at 0 and 24 hours, without C<sub>3</sub>N nanodots and after incubation with C<sub>3</sub>N nanodots for 24 hours. (d) TEM images of AβpE3 peptides under various conditions after 24-hour incubation. Representative micrographs in (b and d) are from three independent experiments with similar results. Source data are provided as a Source Data file.

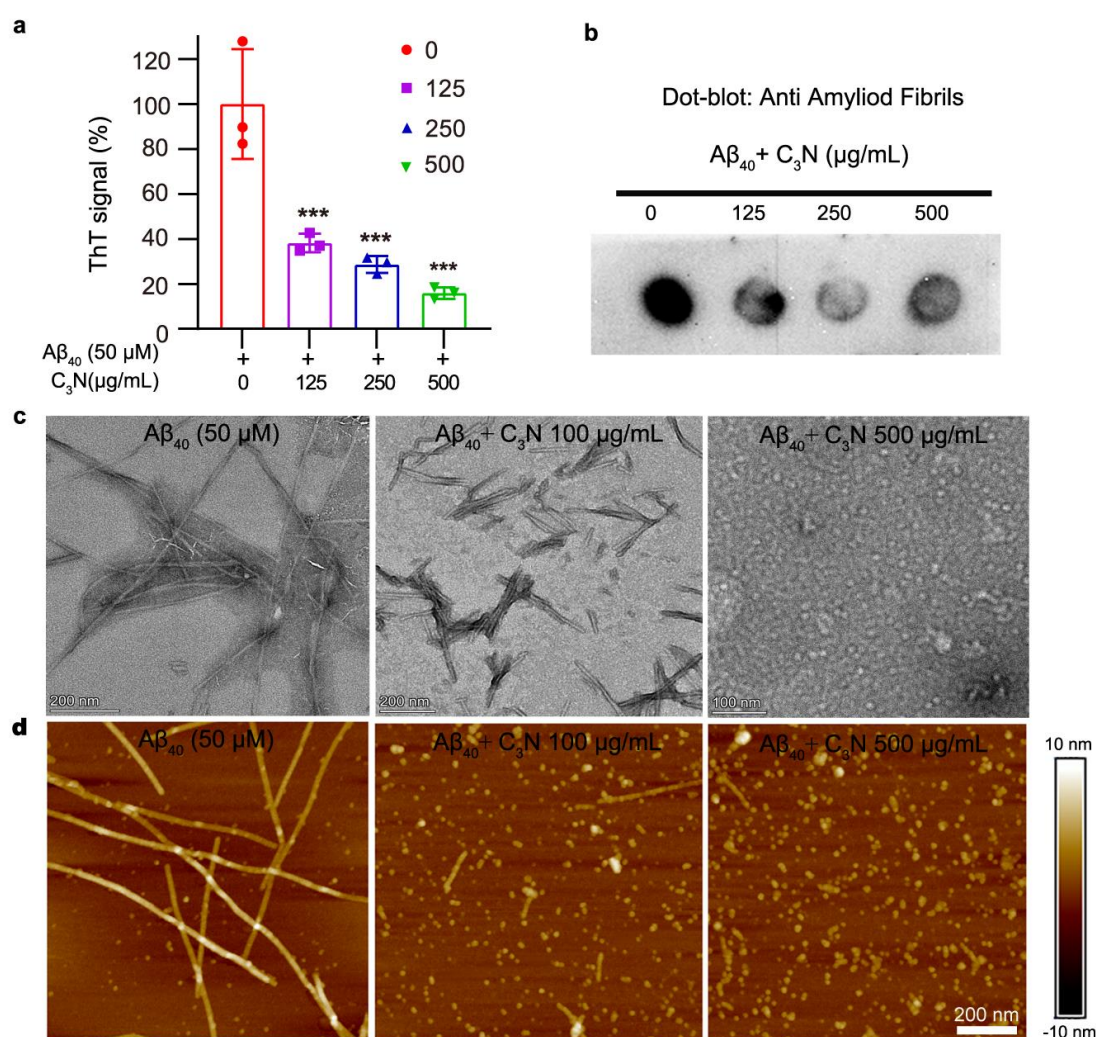

Supplementary Figure 5. C<sub>3</sub>N nanodots inhibit Aβ<sub>40</sub> peptides aggregation in vitro. (a) ThT fluorescence analysis of the effect of C<sub>3</sub>N nanodots on the aggregation of Aβ<sub>40</sub> peptides (50 μM) after 24-hours treatment with different concentrations of C<sub>3</sub>N nanodots. Data are presented as mean ± SD and signals were normalized by setting the ThT signals of control group to 100%.  $n = 3$  for each group ( $P = 0.0008$ ,  $0.0003$  and  $0.0001$ , respectively),  $***P < 0.001$  as determined by one-way ANOVA. (b) Dot blot assay measuring the levels of amyloid fiber formation under different conditions using mOC87 antibody, at time = 24 hours. (c) TEM and (d) AFM images of Aβ<sub>40</sub> peptides under various conditions after 24-hour incubation. Representative micrographs in (b-d) from three independent experiments with similar results. Source data are provided as a Source Data file.



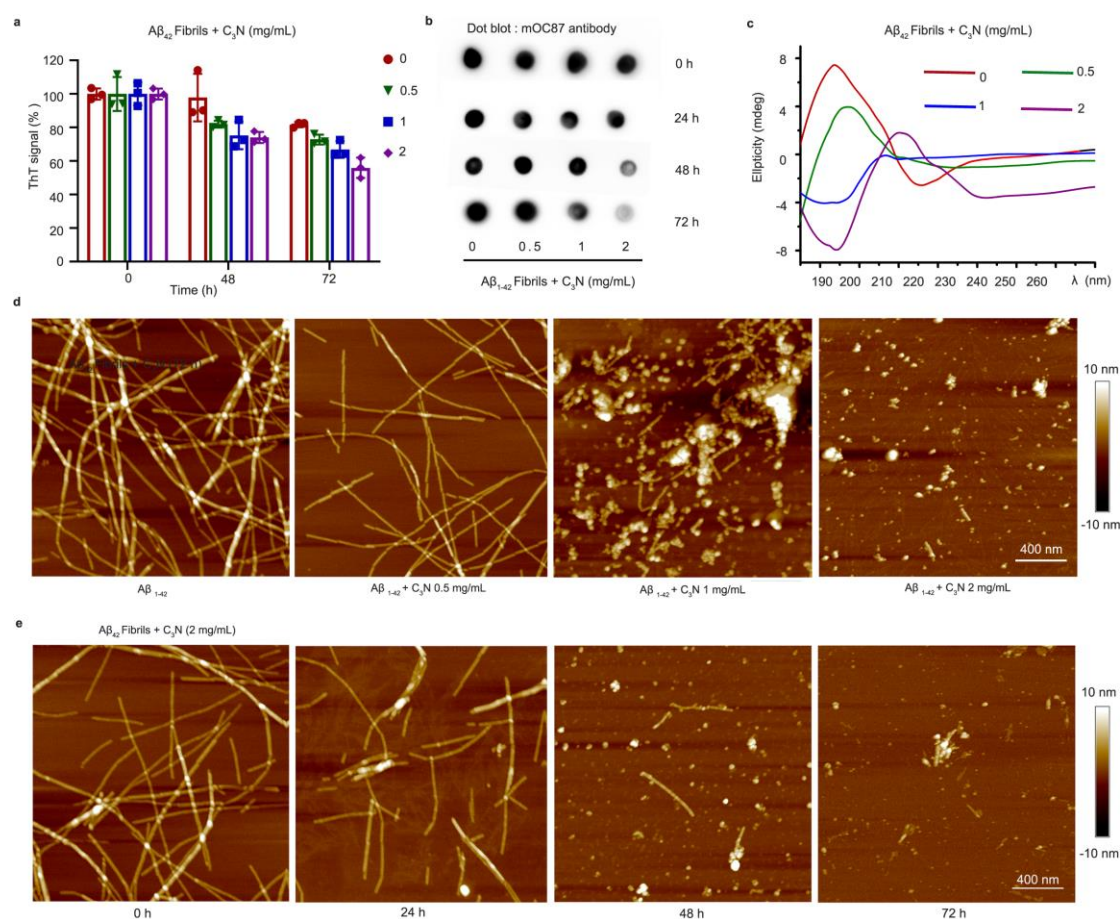

Supplementary Figure 6.  $C_3N$  nanodots disaggregate the preformed  $A\beta_{42}$  mature fibrils in vitro. (a) ThT fluorescence analysis of the impact of  $C_3N$  nanodots on the  $A\beta_{42}$  mature fibrils after 0-, 48- and 72-hour treatment with different concentrations of  $C_3N$  nanodots.  $n = 3$  for each group and signals were normalized by setting the ThT signals of control group to 100%. (b) Dot blot assay measuring the residual levels of preformed  $A\beta_{42}$  mature fibrils after treatment with different concentrations of  $C_3N$  nanodots for 0-, 24-, 48- and 72-hour using mOC87 antibody. (c) CD spectra of  $A\beta_{42}$  mature fibrils treatment with different concentrations of  $C_3N$  nanodots for 72 hours. (d) AFM images of  $A\beta_{42}$  mature fibrils treatment with different concentrations of  $C_3N$  nanodots for 72 hours. (e) AFM images of  $A\beta_{42}$  mature fibrils treatment with different concentrations of  $C_3N$  nanodots for 0-, 24-, 48- and 72-hour. (f) TEM images of  $A\beta_{42}$  mature fibrils after treatment with  $C_3N$  nanodots at 2 mg/mL for 0-, 24-, 48- and 72-hour. Source data are provided as a Source Data file.

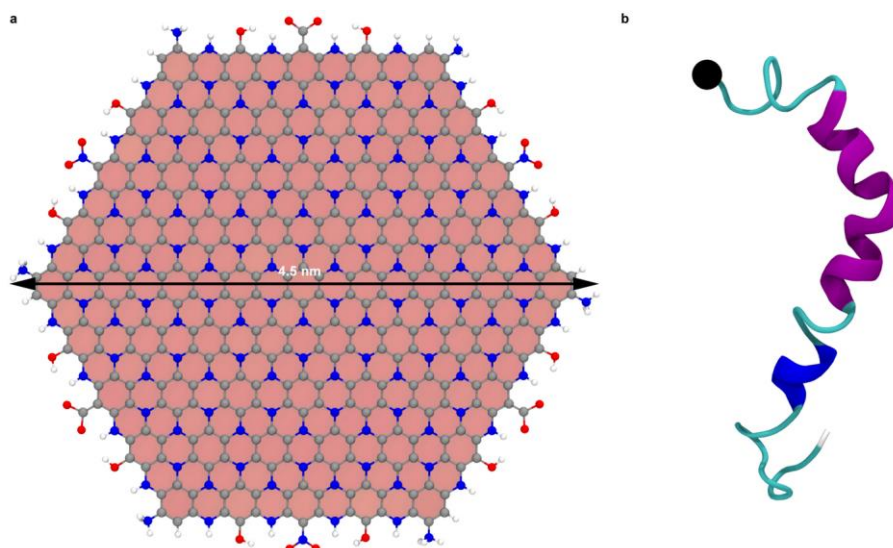

Supplementary Figure 7. Simulation models of C<sub>3</sub>N nanodot and monomeric Aβ<sub>42</sub> peptide. (a) C<sub>3</sub>N model and (b) the initial Aβ<sub>42</sub> structure (PDB ID: 1Z0Q) used in the molecular dynamics simulations.



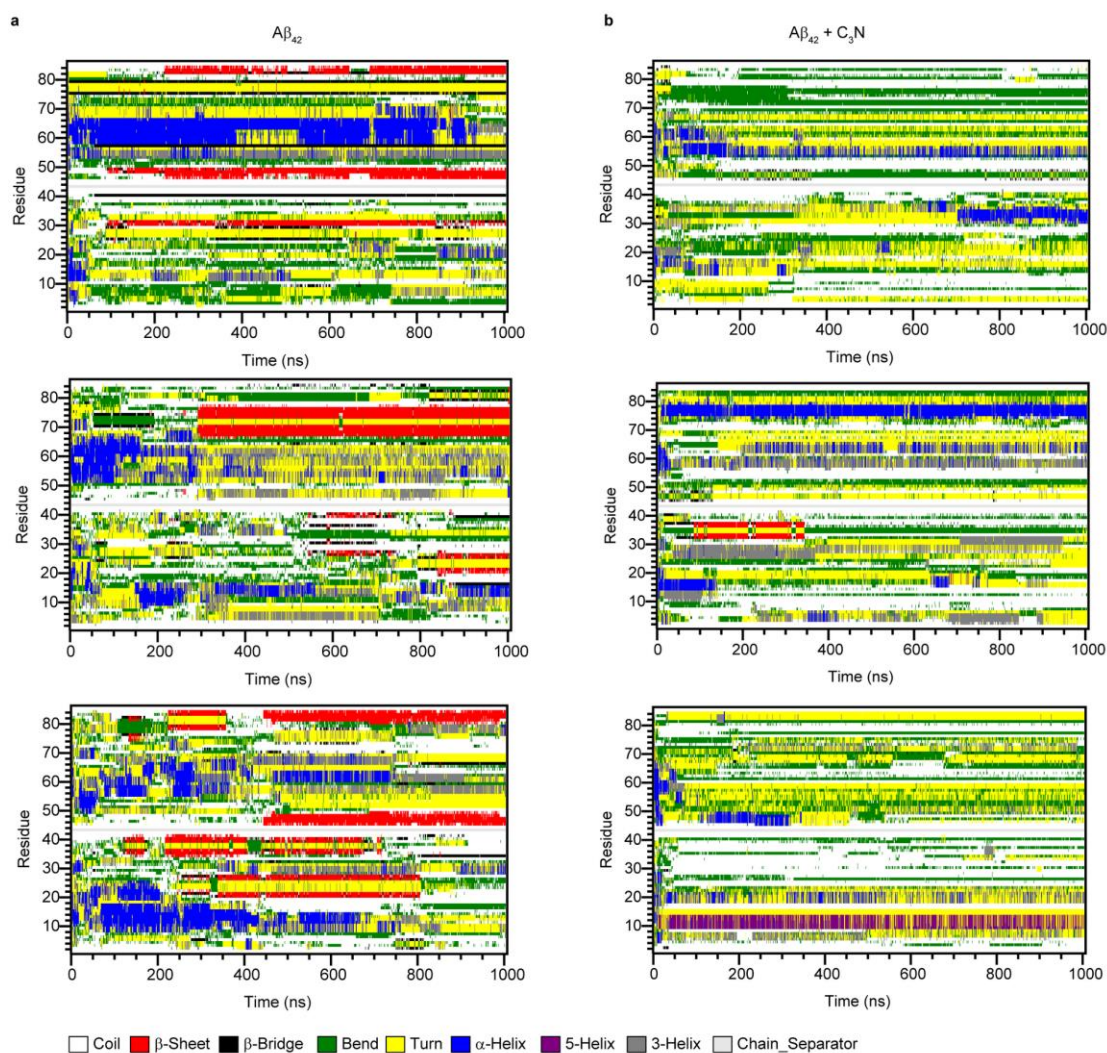

Supplementary Figure 8. The influence of  $C_3N$  nanodot on the secondary structure of  $A\beta_{42}$  peptides. Time evolutions of the secondary structure of  $A\beta_{42}$  peptides (a) in the absence or (b) in the presence of  $C_3N$  nanodot. Three panels from top to bottom in each figure represent three independent runs of each system. Here, the secondary structures of each residue were assigned according to the DSSP definition. Source data are provided as a Source Data file.

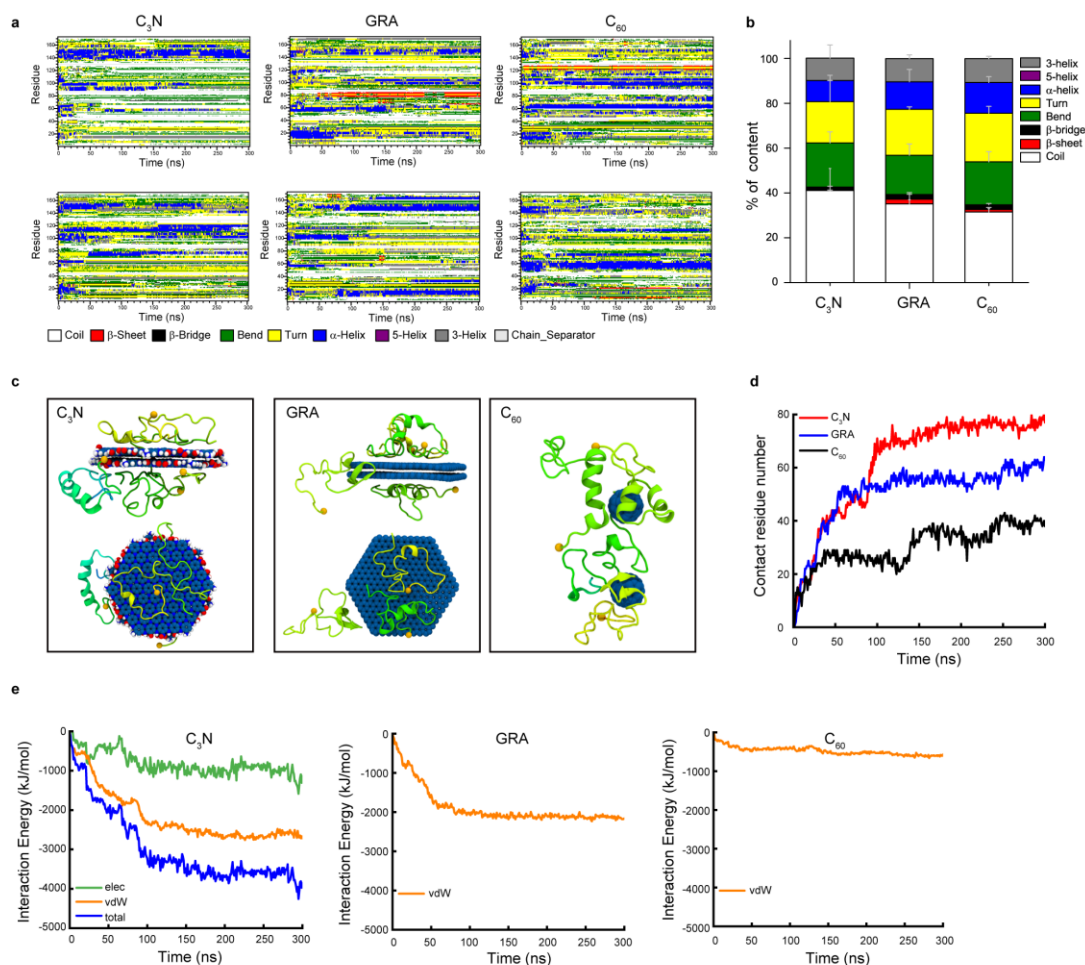

Supplementary Figure 9. Comparison of the influence of stacked  $C_3N$  nanodots (two layers), nano graphite (stacked graphene (GRA)) and fullerenes on the aggregation of  $A\beta_{42}$  peptides. (a) Time evolutions of the secondary structure of each residue in two  $A\beta_{42}$  peptides in the presence of  $C_3N$ -nanodots, stacked GRA and  $C_{60}$  molecules, respectively. (b) The proportions of each structural component in the peptides. The secondary structures of residues were assigned using the DSSP definition. (c) The final binding configurations. (d) Residual contact number between  $A\beta_{42}$  and three nanodots. (e) The nonbonded interaction energies (including electrostatic (elec), van der Waals (vdW) interactions, and a total of them) between  $C_3N$  nanodots, stacked GRA and  $C_{60}$  molecules and peptides during the process. Source data are provided as a Source Data file.

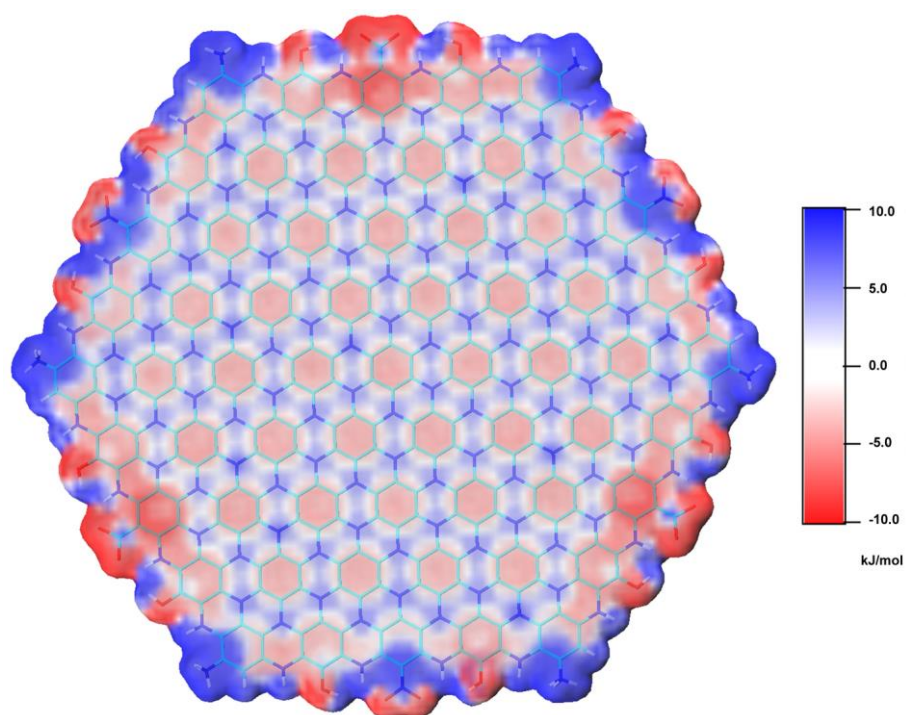

Supplementary Figure 10. Electrostatic surface potentials of C<sub>3</sub>N. Negative, neutral, and positive potentials are displayed in red, white and blue, respectively.

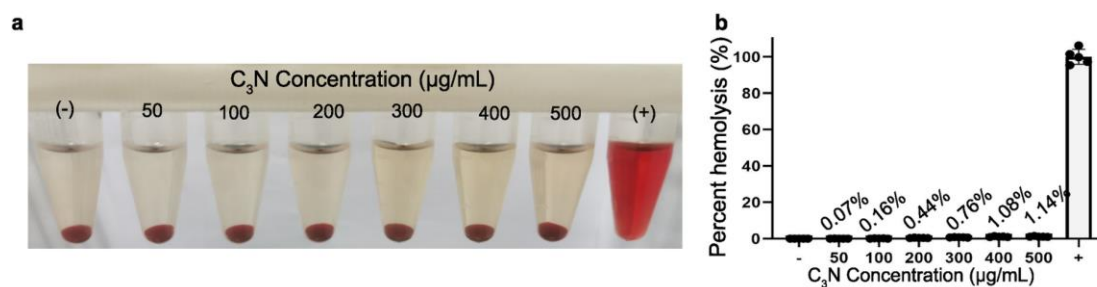

Supplementary Figure 11. Hemolysis activity of C<sub>3</sub>N nanodots. (a) The hemolysis activity of C<sub>3</sub>N nanodots via direct observation of color changes of the RBC centrifuge supernatant after incubation with C<sub>3</sub>N nanodots at different concentrations (50–500 µg/mL) under 37°C for 3 hours. (+) and (–) symbols represented the positive and negative control, respectively. The images are from one experiment representative of five independent experiments with similar results. (b) Hemolysis ratio was calculated by spectrophotometric analysis of RBC centrifuge supernatant. Data are shown as the mean ± SD ( $n = 5$ ). of three independent experiments. Source data are provided as a Source Data file.

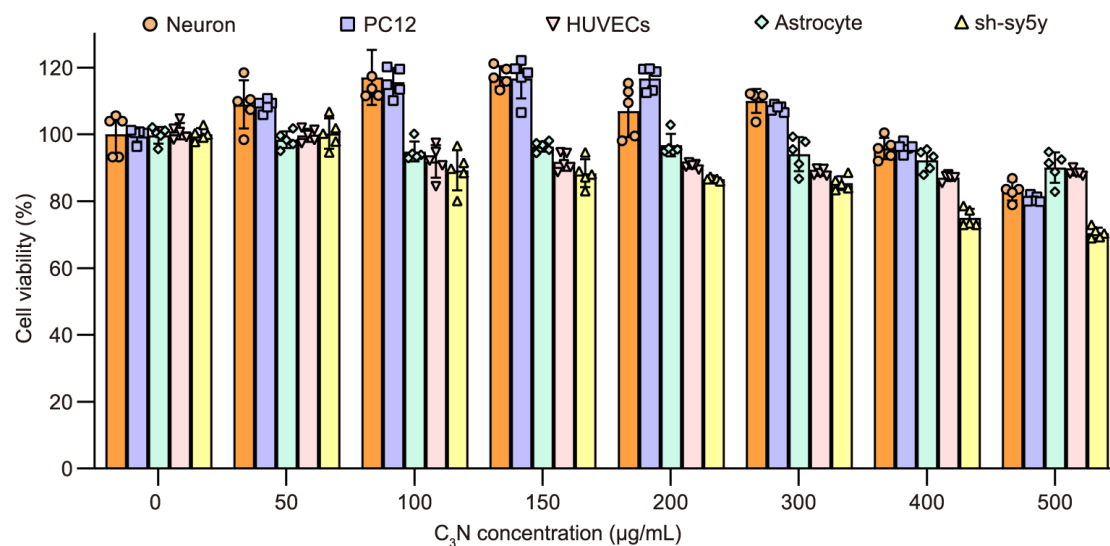

Supplementary Figure 12. Cytotoxicity of C<sub>3</sub>N nanodots in different cell lines. Cells are incubated with varying concentrations of C<sub>3</sub>N nanodots for 24 hours and subsequently assessed using a CCK-8 kit. *n* = 5 per group, data are shown as the mean ± SD. Source data are provided as a Source Data file.

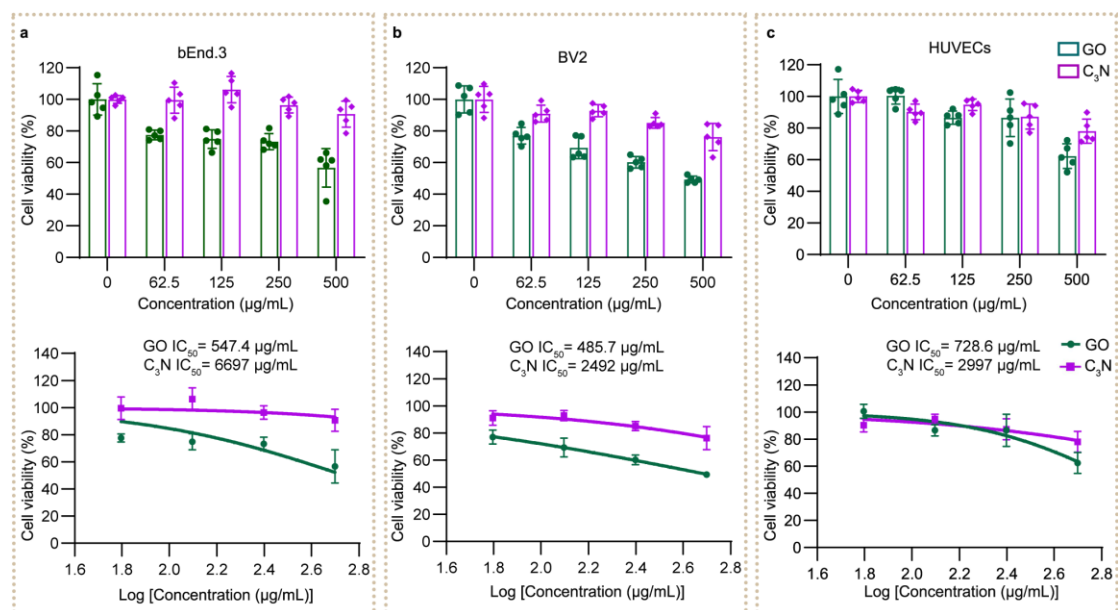

Supplementary Figure 13. Comparison of cytocompatibility between C<sub>3</sub>N nanodots and graphene oxide (GO) nanosheets. Comparative assessment of cytocompatibility between C<sub>3</sub>N nanodots and GO nanosheets in bEnd.3, BV2, and HUVECs cell lines. The top panel displays cell viability measured by CCK8 assay, while the bottom panel presents the  $IC_{50}$  values for the respective cell lines.  $n = 5$  per group, data are shown as the mean  $\pm$  SD. Source data are provided as a Source Data file.



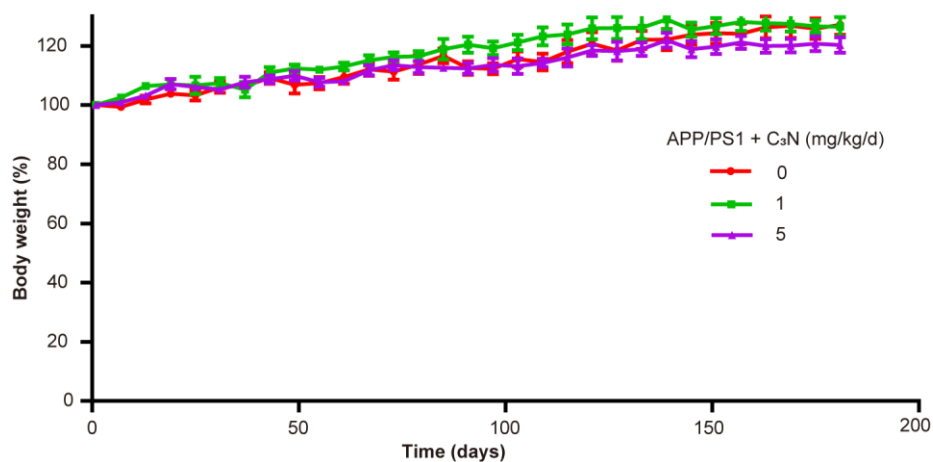

Supplementary Figure 14. Monitoring changes in body weight of mice in each group during the entire C<sub>3</sub>N nanodots administration period. Data are shown as the mean  $\pm$  SD ( $n = 6$  mice per group). Source data are provided as a Source Data file.

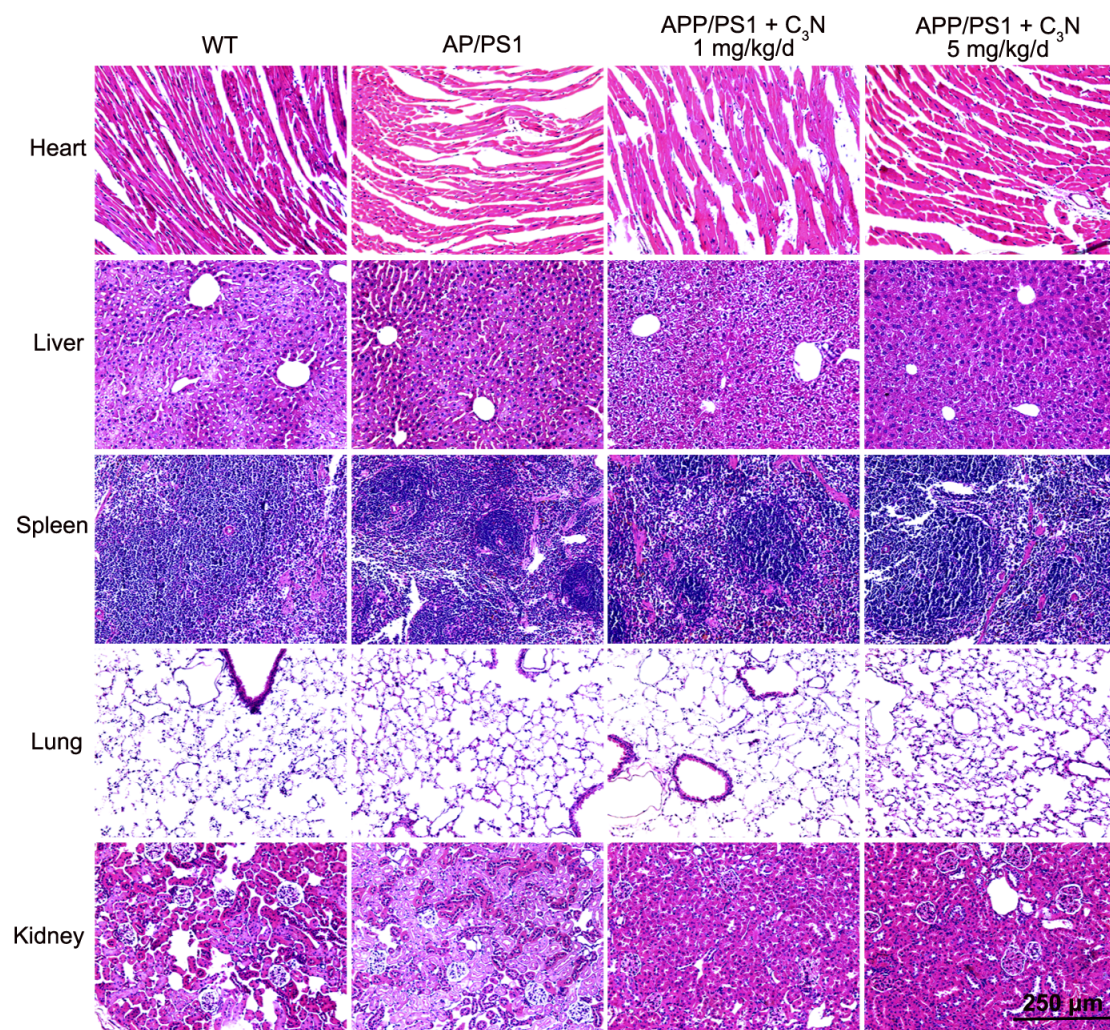

Supplementary Figure 15. Histopathological (H&E) analyses of important organs of mice in each group. The images are representative of three independent mice per group.

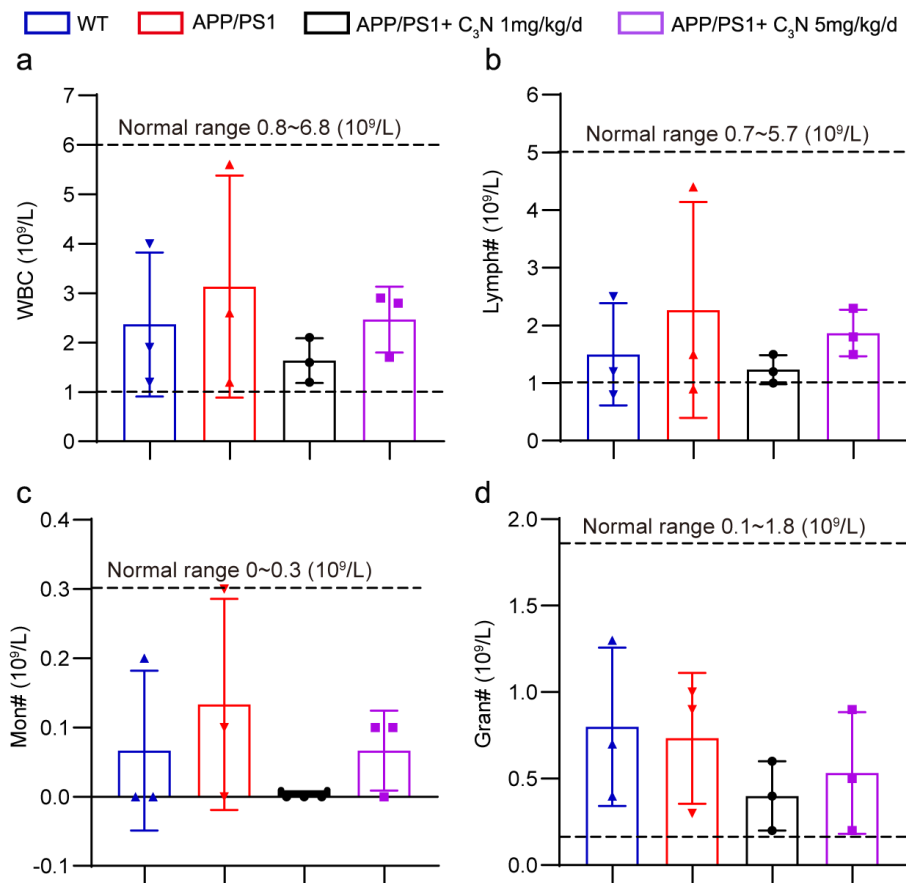

Supplementary Figure 16. The effect of C<sub>3</sub>N nanodots on the inflammation of mice. The inflammation indexes of mice after treatment with C<sub>3</sub>N nanodots for six months at the dose of 1 mg/kg/d and 5 mg/kg/d. (a) White blood cell count (WBC); (b) Lymphocyte count (Lymph#); (c) Monocyte count (Mon#); and (d) Granulocyte count (Gran#). *n* = 3 mice per group, data are shown as the mean ± SD. Source data are provided as a Source Data file.

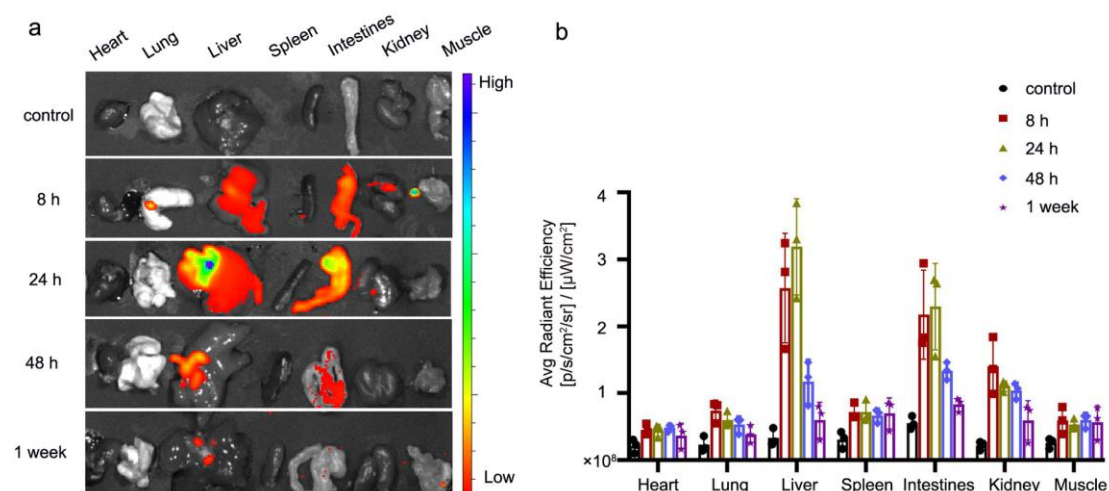

Supplementary Figure 17. Biodistribution of C<sub>3</sub>N nanodots in key organs of mice. (a and b) Biodistribution of Cy5.5-modified (denoted as C<sub>3</sub>N-Cy5.5) C<sub>3</sub>N nanodots after intraperitoneal injection (i.p.) at the dose of 200 mg/kg at different time points. *n* = 3 mice per group, data are shown as the mean ± SD. Increasing fluorescence intensity is illustrated using colors ranging from red to blue. Source data are provided as a Source Data file.

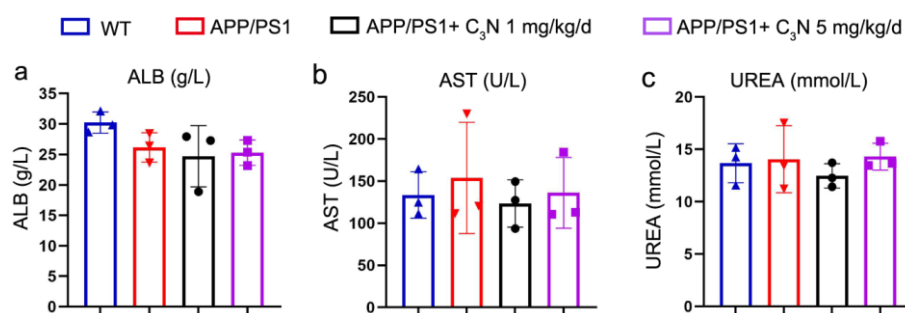

Supplementary Figure 18. The influence of C<sub>3</sub>N nanodots on the liver and kidney functions in mice. The following liver and kidney function indicators of mice after treatment with C<sub>3</sub>N nanodots at the dose of 1 mg/kg/d and 5 mg/kg/d for six months were measured. (a) Aspartate aminotransferase (AST); (b) Albumin (ALB); and (c) Urea (UREA). *n* = 3 mice per group, data are shown as the mean  $\pm$  SD. Source data are provided as a Source Data file.

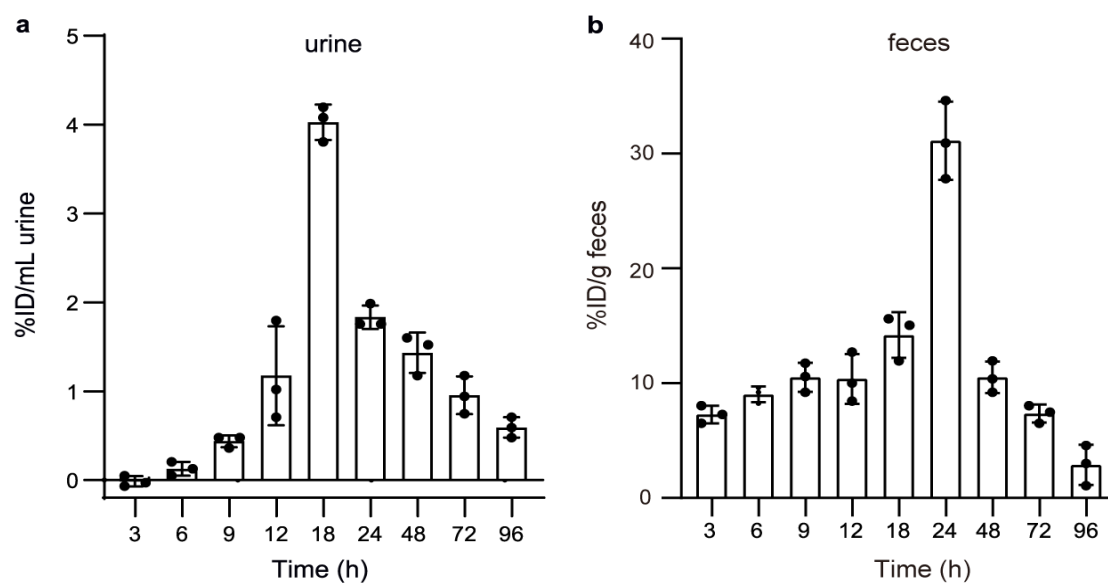

Supplementary Figure 19. Routes of excretion for C<sub>3</sub>N nanodots. Excretion of C<sub>3</sub>N-Cy5.5 nanodots from mice at various time points following i.p. administration at a dose of 100 mg/kg via (a) urination and (b) defecation pathways. Error bars represent the standard deviation of the excretion data obtained from three mice per group. *n* = 3 mice per group, data are shown as the mean  $\pm$  SD. Source data are provided as a Source Data file.



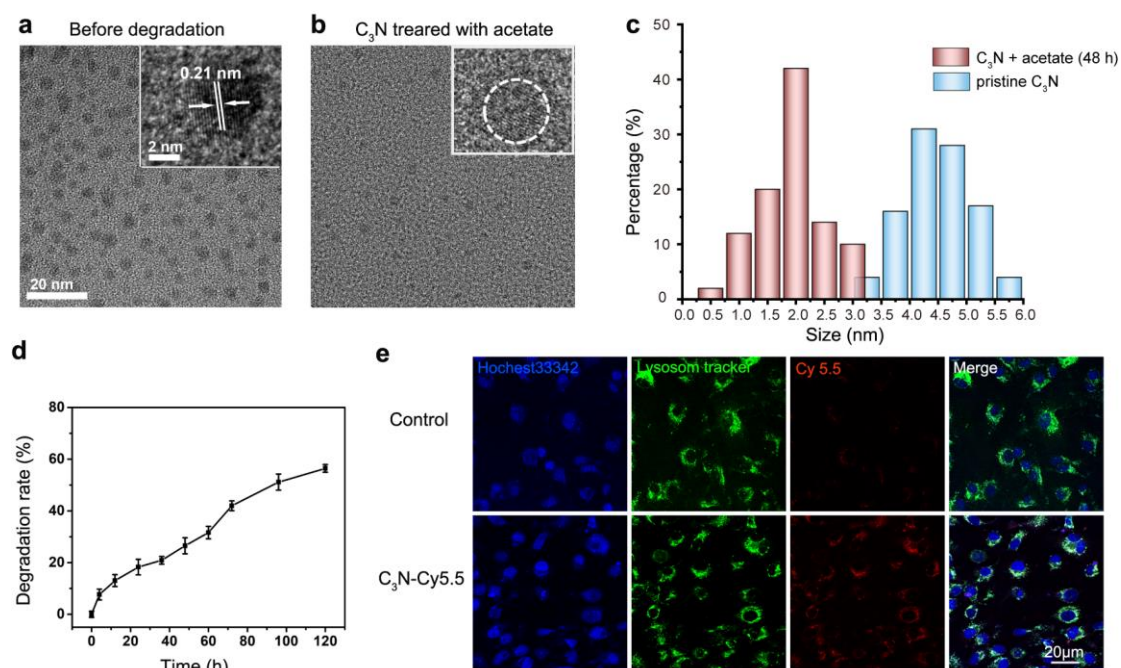

Supplementary Figure 20. Degradation of nanodots under acidic condition similar to lysosomes. (a and b) TEM images (top right corner, high resolution TEM image) and (c) the lateral size distribution of C<sub>3</sub>N nanodots before/after incubated with 0.3 M acetate buffer at pH = 5.0 for 12 hours. (d) The time evolution of degradation rate of C<sub>3</sub>N nanodots as measured by UV-vis spectra. (e) Confocal microscopic images of bEnd.3 cells after a 12-hour incubation with 2 mg/mL Cy5.5-labelled C<sub>3</sub>N nanodots. C<sub>3</sub>N-Cy5.5 nanodots exhibit a red color due to Cy5.5 (ex/em: 673/692 nm). The intracellular localization of C<sub>3</sub>N nanodots (red) can be clearly observed, co-located with LysoTracker Green (green), while Hoechst33342 (blue) was used for staining cell nuclei (scale bar = 20 μm). Source data are provided as a Source Data file.

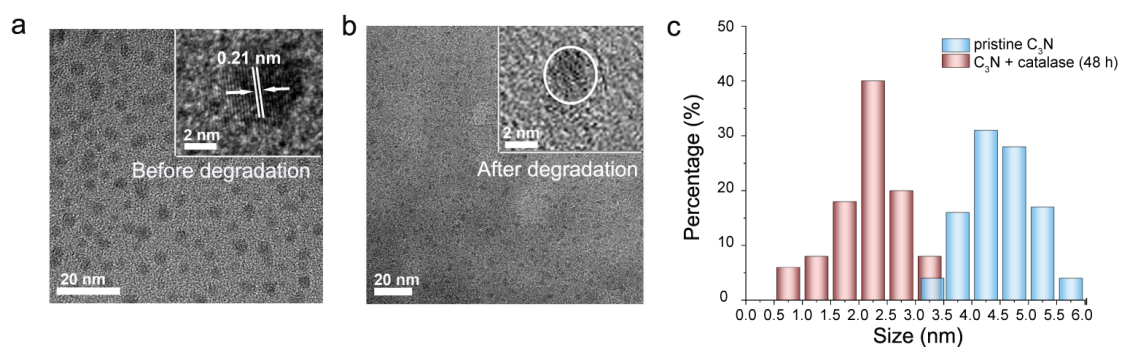

Supplementary Figure 21. Degradation of C<sub>3</sub>N nanodots in the presence of catalase with physiological concentrations of H<sub>2</sub>O<sub>2</sub>. (a and b) TEM images (top right corner, high resolution TEM image) and (c) the lateral size distribution of C<sub>3</sub>N nanodots in the presence/absence of catalase and the physiological concentration (100 μM) of H<sub>2</sub>O<sub>2</sub> at 37 °C for one week. Source data are provided as a Source Data file.
